# Supplementary material for: A nonpolymeric highly emissive ESIPT organogelator with neither dendritic structures nor long alkyl/alkoxy chains
Source: Royal Society of Chemistry journal article supplement (doi:10.1039/c1sm06358h), 2011-11-08
Supplement: c1sm06358h.pdf [file c1sm06358h.pdf]

## Supporting Information

### **A nonpolymeric highly emissive ESIPT organogelator with neither dendritic structures nor long alkyl/alkoxy chains**

**Yan Qian,<sup>\*a,b</sup> Shayu Li,<sup>a</sup> Qian Wang,<sup>a</sup> Xiaohai Sheng,<sup>a</sup> Shikang Wu,<sup>a</sup> Shuangqing Wang,<sup>a</sup> Juan Li<sup>a</sup> and Guoqiang Yang<sup>\*a</sup>**

*<sup>a</sup>Beijing National Laboratory for Molecular Sciences, Key Laboratory of Photochemistry, Institute of Chemistry, Chinese Academy of Sciences, Beijing, China*

*<sup>b</sup>Key Lab for Organic Electronics & Information Displays and Institute of Advanced Materials, Nanjing University of Posts and Telecommunications, Nanjing, China*

*E-mail: gqyang@iccas.ac.cn, qianyan@iccas.ac.cn*

**References for the solvent-gelator interactions:**

- S1. N. Zweep, A. Hopkinson, A. Meetsma, W. R. Browne, B. L. Feringa and J. H. van Esch, *Langmuir*, 2009, **25**, 8802-8809.
- S2. W. Edwards, C. A. Lagadec and D. K. Smith, *Soft. Matter.*, 2011, **7**, 110-117.
- S3. M. Bielejewski and J. Tritt-Goc, *Langmuir*, 2010, **26**, 17459-17464.
- S4. J. Puigmarti-Luis, A. P. del Pino, V. Laukhin, L. N. Feldborg, C. Rovira, E. Laukhina and D. B. Amabilino, *J. Mater. Chem.*, 2010, **20**, 466-474.
- S5. Y. Q. Huang, F. L. Liao, W. R. Zheng, X. L. Liu, X. J. Wu, X. L. Hong and S. C. Tsang, *Langmuir*, 2010, **26**, 3106-3114.
- S6. V. Caplar, L. Frkanec, N. S. Vujicic and M. Zinic, *Chem. Eur. J.*, 2010, **16**, 3066-3082.
- S7. M. Bielejewski, A. Lapinski, R. Luboradzki and J. Tritt-Goc, *Langmuir*, 2009, **25**, 8274-8279.
- S8. G. Y. Zhu and J. S. Dordick, *Chem. Mater.*, 2006, **18**, 5988-5995.
- S9. O. J. Dautel, M. Robitzer, J.-P. Lere-Porte, F. Serein-Spirau and J. J. E. Moreau, *J. Am. Chem. Soc.*, 2006, **128**, 16213-16223.
- S10. A. Dawn, N. Fujita, S. Haraguchi, K. Sada, S.-i. Tamaru and S. Shinkai, *Org Biomol Chem*, 2009, **7**, 4378-4385.

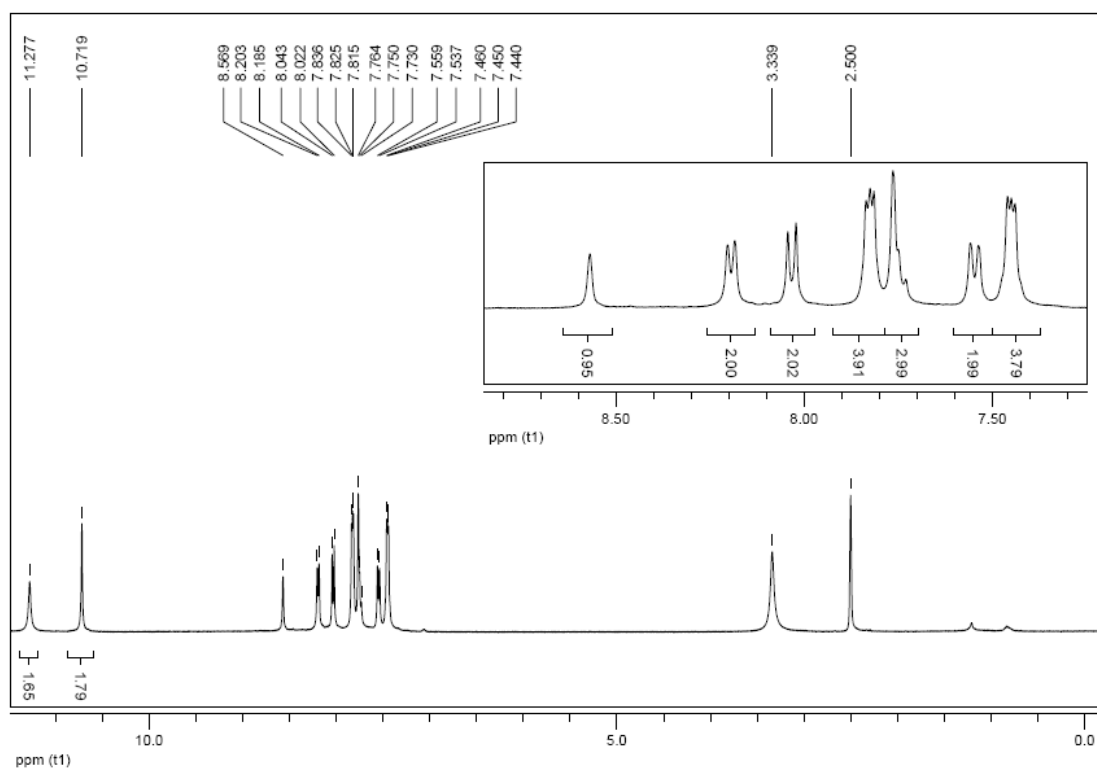

Fig. S1 <sup>1</sup>H-NMR spectrum of BHPIA

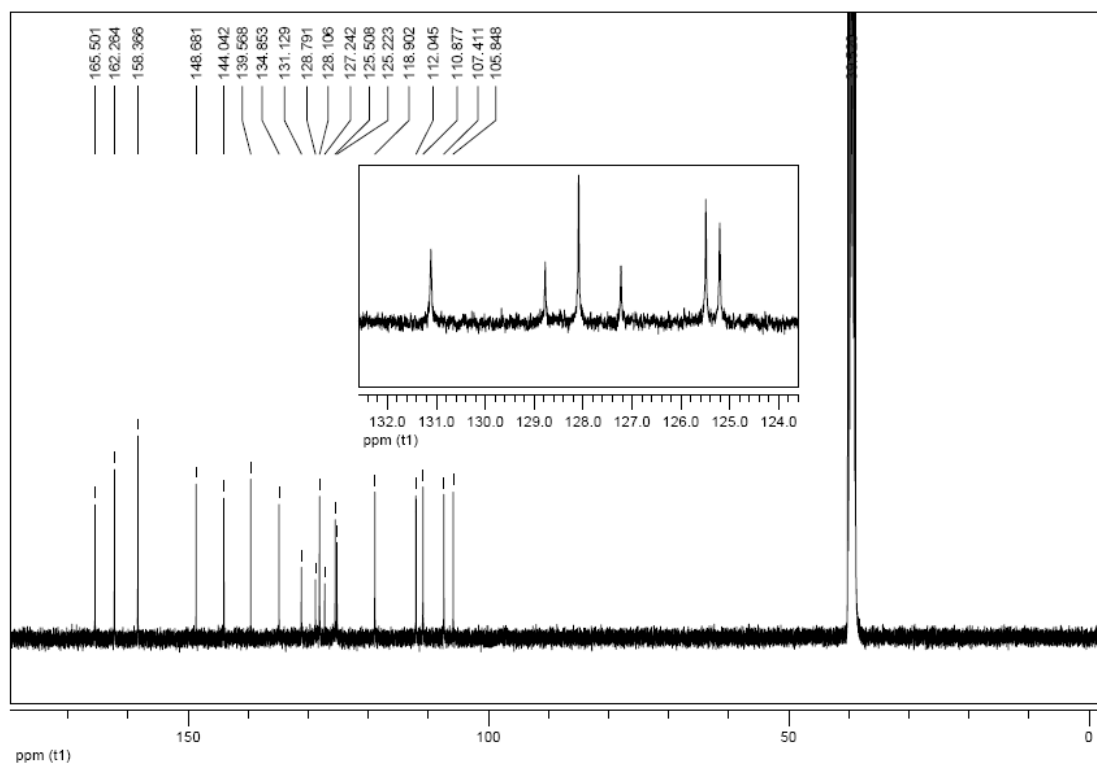

Fig. S2 <sup>13</sup>C-NMR spectrum of BHPIA

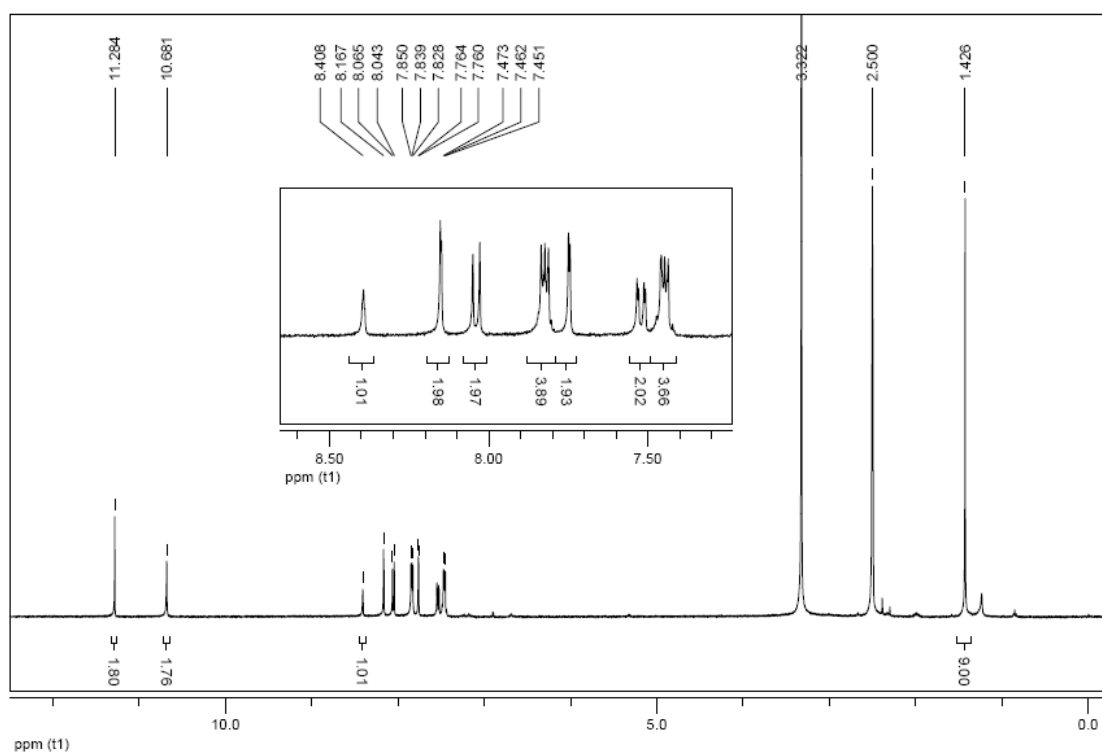

Fig. S3 <sup>1</sup>H-NMR spectrum of BHPBIA

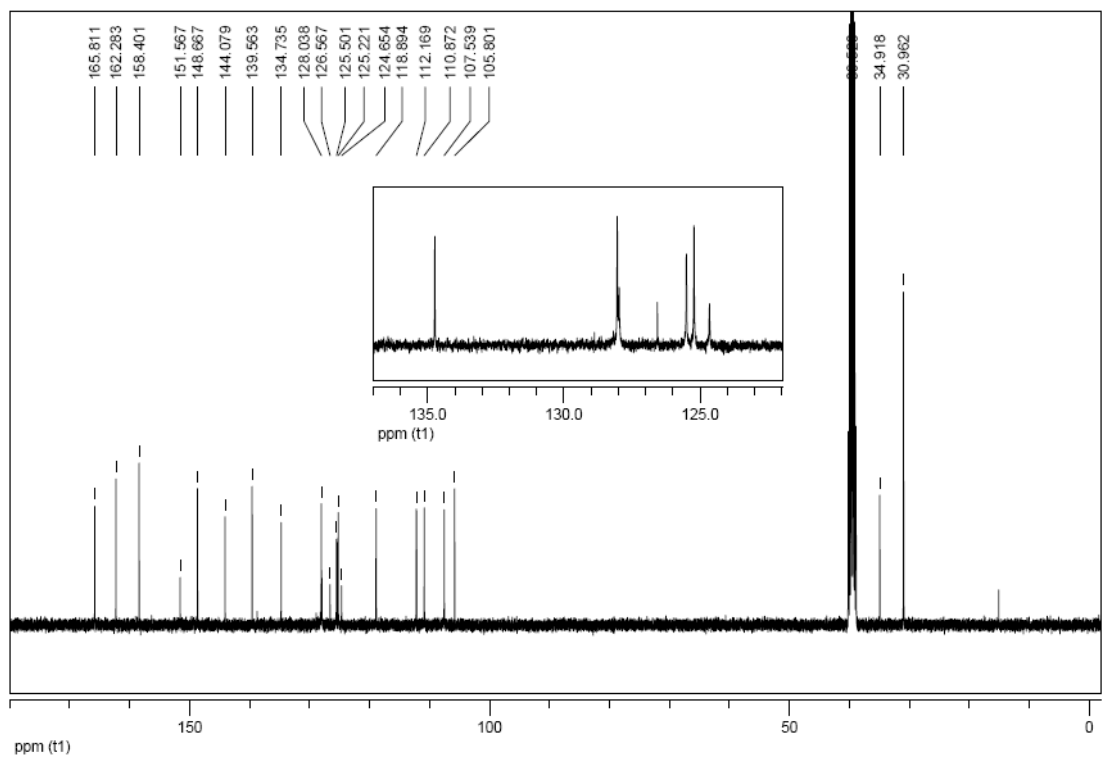

Fig. S4 <sup>13</sup>C-NMR spectrum of BHPBIA
